# Supplementary material for: Problem-Solving Treatment for People Recently Diagnosed with Visual Impairment: Pilot Randomised Controlled Trial
Source: MDPI journal article supplement (doi:10.3390/jpm12091431), 2022-08-31
Supplement: s1 [file s1]

**Table S1 (supplementary data): Descriptive results from the Health Resource Use Questionnaire, values are mean (sd)**

|                                                | Baseline <sup>1</sup> |           | 6 Month <sup>2</sup> |           | 9 Month <sup>3</sup> |           |
|------------------------------------------------|-----------------------|-----------|----------------------|-----------|----------------------|-----------|
| Variable                                       | PST                   | no PST    | PST                  | no PST    | PST                  | no PST    |
| Number times saw GP surgery                    | 0.5 (0.7)             | 0.4 (0.8) | 0.5 (0.6)            | 0.8 (0.8) | 0.5 (0.6)            | 0.3 (0.5) |
| Number times saw GP home                       | 0.1 (0.3)             | 0.0 (0.0) | 0.1 (0.3)            | 0.1 (0.4) | 0.0 (0.0)            | 0.2 (0.5) |
| Number times spoke to GP telephone             | 0.4 (1.3)             | 0.0 (0.0) | 0.3 (0.5)            | 0.2 (0.4) | 0.0 (0.0)            | 0.1 (0.2) |
| Number times saw practice nurse at surgery     | 0.2 (0.6)             | 0.3 (0.6) | 0.1 (0.3)            | 0.4 (0.9) | 0.1 (0.2)            | 0.3 (0.7) |
| Number times saw counsellor                    | 0.0 (0.0)             | 0.0 (0.0) | 0.0 (0.0)            | 0.0 (0.0) | 0.0 (0.0)            | 0.0 (0.0) |
|                                                |                       |           |                      |           |                      |           |
| Number times saw social worker                 | 0.4 (0.7)             | 0.3 (0.4) | 0.0 (0.2)            | 0.0 (0.0) | 0.0 (0.0)            | 0.4 (1.8) |
|                                                |                       |           |                      |           |                      |           |
| Number of times saw psychiatrist at hospital   | 0.0 (0.0)             | 0.0 (0.0) | 0.0 (0.2)            | 0.0 (0.0) | 0.0 (0.0)            | 0.0 (0.0) |
| Number times saw psychiatrist at home          | 0.0 (0.0)             | 0.0 (0.0) | 0.0 (0.0)            | 0.0 (0.0) | 0.0 (0.0)            | 0.0 (0.0) |
| Number of times saw psychologist               | 0.0 (0.0)             | 0.0 (0.0) | 0.0 (0.0)            | 0.0 (0.0) | 0.0 (0.0)            | 0.0 (0.0) |
|                                                |                       |           |                      |           |                      |           |
| Number of times attended day hospital          | 0.4 (0.9)             | 0.1 (0.3) | 0.2 (0.4)            | 0.1 (0.3) | 0.6 (1.7)            | 0.2 (0.5) |
| Number of times A & E                          | 0.1 (0.4)             | 0.1 (0.3) | 0.0 (0.2)            | 0.0 (0.0) | 0.1 (0.3)            | 0.1 (0.2) |
| Number of nights in hospital ward              | 0.0 (0.0)             | 0.0 (0.0) | 1.0 (4.2)            | 0.0 (0.0) | 0.0 (0.0)            | 0.3 (0.9) |
| Number contacts with anyone else from hospital | 0.6 (1.0)             | 0.6 (1.0) | 0.3 (0.7)            | 0.5 (0.9) | 0.3 (0.5)            | 0.3 (0.7) |
|                                                |                       |           |                      |           |                      |           |
| Paid for over the counter medications          | 1.8 (0.4)             | 1.9 (0.3) | 1.9 (0.3)            | 1.8 (0.4) | 1.7 (0.5)            | 1.8 (0.4) |
|                                                |                       |           |                      |           |                      |           |
| Are you in paid employment                     | 2.7 (0.7)             | 2.8 (0.6) | 2.7 (0.6)            | 2.8 (0.5) | 2.7 (0.7)            | 2.8 (0.6) |
| Friends or family taken time off work to help  | 2.0 (0.2)             | 2.0 (0.2) | 2.0 (0.0)            | 2.0 (0.2) | 1.8 (0.4)            | 1.9 (0.3) |
| Days unable to follow usual daily activities   | 13 (13)               | 7 (11)    | 7 (11)               | 6 (11)    | 4 (9)                | 14 (13)   |

<sup>1</sup>Minimum sample sizes = 25 (PST) and 28 (no PST); <sup>2</sup>24 (PST) and 25 (no PST); <sup>3</sup>17 (PST) and 18 (no PST)
